# Supplementary material
Source: PubMed Central journal article supplement (PMC10905608)
Supplement: NIHMS1957033-supplement-Extras.pdf [file NIHMS1957033-supplement-Extras.pdf]

Supplementary Table 1. Univariate analysis of clinical, treatment, and outcome factors associated with overall survival.

| Parameter                                     | Hazard ratio | 95% confidence interval | p-value          |
|-----------------------------------------------|--------------|-------------------------|------------------|
| Age (continuous)                              | 1.01         | 0.99-1.04               | 0.328            |
| Gender (female vs. male)                      | 1.25         | 0.67-2.33               | 0.491            |
| Pre-SABR ECOG performance status (continuous) | 1.40         | 1.03-1.90               | <b>0.033</b>     |
| Pack-years smoking (continuous)               | 1.00         | 0.99-1.01               | 0.914            |
| Smoking at last follow-up (yes vs. no)        | 1.07         | 0.38-3.02               | 0.903            |
| Receipt of chemotherapy (yes vs. no)          | 0.45         | 0.24-0.87               | <b>0.018</b>     |
| Cycles of chemotherapy                        |              |                         |                  |
| < 4 cycles vs. none                           | 0.36         | 0.13-1.02               | 0.055            |
| ≥ 4 cycles vs. none                           | 0.47         | 0.24-0.94               | <b>0.032</b>     |
| Unknown vs. none                              | 0.58         | 0.13-2.53               | 0.465            |
| Timing of chemotherapy                        |              |                         |                  |
| Pre-SABR vs. none                             | 0.70         | 0.29-1.65               | 0.41             |
| Post-SABR vs. none                            | 0.37         | 0.18-0.77               | <b>0.007</b>     |
| Pre-SABR/concurrently vs. none                | 0.14         | 0.02-1.25               | 0.078            |
| Tumor location (central vs. peripheral)       | 0.71         | 0.32-1.53               | 0.378            |
| Mediastinal nodal sampling (yes vs. no)       | 0.80         | 0.39-1.63               | 0.533            |
| Tumor size                                    |              |                         |                  |
| Continuous                                    | 1.20         | 0.97-1.49               | 0.086            |
| > 2 cm vs. ≤ 2 cm                             | 1.81         | 0.93-3.54               | 0.08             |
| > 3 cm vs. ≤ 3 cm                             | 1.10         | 0.57-2.15               | 0.77             |
| PCI (yes vs. no)                              | 0.49         | 0.22-1.08               | 0.076            |
| Radiation dose                                |              |                         |                  |
| Continuous                                    | 0.97         | 0.90-1.04               | 0.401            |
| ≥ 50 Gy vs. < 50 Gy                           | 0.60         | 0.21-1.74               | 0.35             |
| Biologically effective dose                   |              |                         |                  |
| Continuous                                    | 1.00         | 0.99-1.01               | 0.859            |
| > 130 Gy vs. < 130 Gy                         | 1.14         | 0.58-2.21               | 0.707            |
| Tumor response                                |              |                         |                  |
| PR vs. CR                                     | 1.60         | 0.73-3.53               | 0.242            |
| SD/PD vs. CR                                  | 1.20         | 0.47-3.06               | 0.698            |
| Nodal failure (yes vs. no)                    | 0.06         | 0.02-0.16               | <b>&lt;0.001</b> |
| Elsewhere lung failure (yes vs. no)           | 0.92         | 0.38-2.23               | 0.86             |
| Distant metastasis                            |              |                         |                  |
| Yes vs. no                                    | 0.79         | 0.35-1.79               | 0.577            |
| Time to distant metastasis                    | 0.997        | 0.995-0.998             | <b>&lt;0.001</b> |
| Any failure                                   |              |                         |                  |
| Yes vs. no                                    | 1.06         | 0.48-2.32               | 0.887            |
| Time to any failure                           | 0.997        | 0.996-0.999             | <b>&lt;0.001</b> |

Bold p-values are statistically significant. ECOG, Eastern Cooperative Oncology Group; SABR, stereotactic body radiation therapy; PCI, prophylactic cranial irradiation; Gy, Gray; PR, partial response; CR, complete response; SD, stable disease; PD, progressive disease

Supplementary Table 2. Univariate analysis of clinical, treatment, and outcome factors associated with disease-free survival.

| Parameter                                     | Hazard ratio | 95% confidence interval | p-value      |
|-----------------------------------------------|--------------|-------------------------|--------------|
| Age (continuous)                              | 1.01         | 0.97-1.05               | 0.657        |
| Gender (female vs. male)                      | 0.90         | 0.43-1.89               | 0.782        |
| Pre-SABR ECOG performance status (continuous) | 1.36         | 0.93-1.98               | 0.11         |
| Pack-years smoking (continuous)               | 1.00         | 0.99-1.01               | 0.844        |
| Smoking at last follow-up (yes vs. no)        | 0.62         | 0.15-2.62               | 0.519        |
| Receipt of chemotherapy (yes vs. no)          | 0.42         | 0.20-0.90               | <b>0.026</b> |
| Cycles of chemotherapy                        |              |                         |              |
| < 4 cycles vs. none                           | 0.36         | 0.11-1.18               | 0.093        |
| ≥ 4 cycles vs. none                           | 0.44         | 0.20-1.00               | <b>0.05</b>  |
| Unknown vs. none                              | 0.43         | 0.06-3.30               | 0.415        |
| Timing of chemotherapy                        |              |                         |              |
| Pre-SABR vs. none                             | 0.67         | 0.24-1.90               | 0.454        |
| Post-SABR vs. none                            | 0.35         | 0.15-0.82               | <b>0.016</b> |
| Pre-SABR/concurrently vs. none                | 0.15         | 0.01-1.66               | 0.123        |
| Tumor location (central vs. peripheral)       | 0.71         | 0.27-1.88               | 0.494        |
| Mediastinal nodal sampling (yes vs. no)       | 0.57         | 0.22-1.50               | 0.253        |
| Tumor size                                    |              |                         |              |
| Continuous                                    | 1.10         | 0.85-1.42               | 0.459        |
| > 2 cm vs. ≤ 2 cm                             | 1.00         | 0.48-2.08               | 0.992        |
| > 3 cm vs. ≤ 3 cm                             | 0.78         | 0.33-1.83               | 0.565        |
| PCI (yes vs. no)                              | 0.42         | 0.14-1.22               | 0.111        |
| Radiation dose                                |              |                         |              |
| Continuous                                    | 0.97         | 0.90-1.05               | 0.468        |
| ≥ 50 Gy vs. < 50 Gy                           | 0.38         | 0.15-0.95               | <b>0.039</b> |
| Biologically effective dose                   |              |                         |              |
| Continuous                                    | 0.99         | 0.98-1.01               | 0.349        |
| > 130 Gy vs. < 130 Gy                         | 0.77         | 0.33-1.81               | 0.551        |
| Tumor response                                |              |                         |              |
| PR vs. CR                                     | 3.37         | 1.12-10.10              | <b>0.03</b>  |
| SD/PD vs. CR                                  | 2.45         | 0.73-8.25               | 0.148        |

Bold p-values are statistically significant. ECOG, Eastern Cooperative Oncology Group; SABR, stereotactic body radiation therapy; PCI, prophylactic cranial irradiation; Gy, Gray; PR, partial response; CR, complete response; SD, stable disease; PD, progressive disease

Supplementary Table 3. Univariate analysis of clinical, treatment, and outcome factors associated with disease-specific survival.

| Parameter                                     | Hazard ratio | 95% confidence interval | p-value      |
|-----------------------------------------------|--------------|-------------------------|--------------|
| Age (continuous)                              | 1.02         | 0.98-1.07               | 0.325        |
| Gender (female vs. male)                      | 0.65         | 0.23-1.84               | 0.422        |
| Pre-SABR ECOG performance status (continuous) | 1.22         | 0.73-2.03               | 0.445        |
| Pack-years smoking (continuous)               | 0.998        | 0.98-1.02               | 0.809        |
| Smoking at last follow-up (yes vs. no)        | 0.71         | 0.09-5.48               | 0.744        |
| Receipt of chemotherapy (yes vs. no)          | 0.51         | 0.18-1.44               | 0.201        |
| Cycles of chemotherapy<br>< 4 cycles vs. none | 0.50         | 0.10-2.53               | 0.402        |
| ≥ 4 cycles vs. none                           | 0.56         | 0.19-1.68               | 0.304        |
| Timing of chemotherapy<br>Pre-SABR vs. none   | 0.78         | 0.19-3.16               | 0.732        |
| Post-SABR vs. none                            | 0.37         | 0.11-1.21               | 0.101        |
| Tumor location (central vs. peripheral)       | 1.001        | 0.32-3.11               | 0.999        |
| Mediastinal nodal sampling (yes vs. no)       | 0.34         | 0.08-1.50               | 0.154        |
| Tumor size<br>Continuous                      | 1.23         | 0.89-1.71               | 0.218        |
| > 2 cm vs. ≤ 2 cm                             | 0.95         | 0.34-2.62               | 0.92         |
| > 3 cm vs. ≤ 3 cm                             | 1.13         | 0.39-3.31               | 0.824        |
| PCI (yes vs. no)                              | 0.48         | 0.14-1.72               | 0.261        |
| Radiation dose<br>Continuous                  | 0.96         | 0.86-1.08               | 0.501        |
| ≥ 50 Gy vs. < 50 Gy                           | 0.97         | 0.12-7.58               | 0.977        |
| Biologically effective dose<br>Continuous     | 0.99         | 0.97-1.01               | 0.204        |
| > 130 Gy vs. < 130 Gy                         | 0.75         | 0.24-2.38               | 0.63         |
| Tumor response<br>PR vs. CR                   | 1.67         | 0.43-6.47               | 0.457        |
| SD/PD vs. CR                                  | 2.55         | 0.63-10.29              | 0.187        |
| Nodal failure<br>Yes vs. no                   | 0.16         | 0.02-1.08               | 0.061        |
| Time to nodal failure                         | 0.988        | 0.981-0.995             | <b>0.001</b> |
| Elsewhere lung failure (yes vs. no)           | 1.56         | 0.43-5.61               | 0.499        |
| Distant metastasis<br>Yes vs. no              | 2.86         | 0.62-13.24              | 0.179        |
| Time to distant metastasis                    | 0.994        | 0.989-0.999             | <b>0.016</b> |
| Any failure (time to any failure)             | 0.996        | 0.992-1.001             | 0.114        |

Bold p-values are statistically significant. ECOG, Eastern Cooperative Oncology Group; SABR, stereotactic body radiation therapy; PCI, prophylactic cranial irradiation; Gy, Gray; PR, partial response; CR, complete response; SD, stable disease; PD, progressive disease

Supplementary Table 4. Univariate analysis of clinical, treatment, and outcome factors associated with distant metastasis-free survival.

| Parameter                                     | Hazard ratio | 95% confidence interval | p-value      |
|-----------------------------------------------|--------------|-------------------------|--------------|
| Age (continuous)                              | 1.01         | 0.97-1.05               | 0.615        |
| Gender (female vs. male)                      | 0.74         | 0.31-1.73               | 0.483        |
| Pre-SABR ECOG performance status (continuous) | 1.17         | 0.76-1.81               | 0.471        |
| Pack-years smoking (continuous)               | 1.00         | 0.98-1.01               | 0.726        |
| Smoking at last follow-up (yes vs. no)        | 0.35         | 0.05-2.57               | 0.299        |
| Receipt of chemotherapy (yes vs. no)          | 0.54         | 0.22-1.29               | 0.164        |
| Cycles of chemotherapy<br>< 4 cycles vs. none | 0.86         | 0.26-2.80               | 0.798        |
| ≥ 4 cycles vs. none                           | 0.50         | 0.19-1.31               | 0.158        |
| Timing of chemotherapy<br>Post-SABR vs. none  | 0.59         | 0.18-1.98               | 0.388        |
| Tumor location (central vs. peripheral)       | 0.76         | 0.26-2.25               | 0.618        |
| Mediastinal nodal sampling (yes vs. no)       | 0.24         | 0.06-1.05               | 0.058        |
| Tumor size<br>Continuous                      | 1.20         | 0.90-1.60               | 0.212        |
| > 2 cm vs. ≤ 2 cm                             | 1.20         | 0.51-2.81               | 0.673        |
| > 3 cm vs. ≤ 3 cm                             | 0.97         | 0.38-2.50               | 0.95         |
| PCI (yes vs. no)                              | 0.42         | 0.12-1.46               | 0.173        |
| Radiation dose<br>Continuous                  | 0.96         | 0.88-1.05               | 0.325        |
| ≥ 50 Gy vs. < 50 Gy                           | 0.30         | 0.11-0.83               | <b>0.02</b>  |
| Biologically effective dose<br>Continuous     | 0.99         | 0.97-1.01               | 0.206        |
| > 130 Gy vs. < 130 Gy                         | 0.67         | 0.25-1.82               | 0.434        |
| Tumor response<br>PR vs. CR                   | 2.28         | 0.73-7.08               | 0.154        |
| SD/PD vs. CR                                  | 1.39         | 0.37-5.23               | 0.623        |
| Local failure<br>Yes vs. no                   | 0.28         | 0.02-4.61               | 0.375        |
| Time to local failure                         | 0.98         | 0.96-0.99               | <b>0.005</b> |
| Nodal failure<br>Yes vs. no                   | 0.39         | 0.10-1.55               | 0.182        |
| Time to nodal failure                         | 0.99         | 0.98-1.00               | <b>0.003</b> |
| Elsewhere lung failure<br>Yes vs. no          | 1.26         | 0.44-3.67               | 0.666        |
| Time to elsewhere lung failure                | 0.98         | 0.96-0.99               | <b>0.005</b> |

Bold p-values are statistically significant. ECOG, Eastern Cooperative Oncology Group; SABR, stereotactic body radiation therapy; PCI, prophylactic cranial irradiation; Gy, Gray; PR, partial response; CR, complete response; SD, stable disease; PD, progressive disease

Supplementary Table 5. Univariate analysis of clinical, treatment, and outcome factors associated with local control.

| Parameter                                     | Hazard ratio | 95% confidence interval | p-value      |
|-----------------------------------------------|--------------|-------------------------|--------------|
| Age (continuous)                              | 0.999        | 0.88-1.13               | 0.987        |
| Pre-SABR ECOG performance status (continuous) | 0.25         | 0.03-2.16               | 0.207        |
| Pack-years smoking (continuous)               | 1.02         | 0.99-1.05               | 0.256        |
| Receipt of chemotherapy (yes vs. no)          | 0.46         | 0.03-7.39               | 0.584        |
| Cycles of chemotherapy                        |              |                         |              |
| < 4 cycles vs. none                           | 0.98         | 0.05-19.99              | 0.991        |
| ≥ 4 cycles vs. none                           | 0.32         | 0.01-6.94               | 0.467        |
| Tumor location (central vs. peripheral)       | 8.76         | 0.79-96.85              | 0.077        |
| Tumor size                                    |              |                         |              |
| Continuous                                    | 1.10         | 0.48-2.52               | 0.826        |
| > 2 cm vs. ≤ 2 cm                             | 0.67         | 0.05-8.51               | 0.761        |
| PCI (yes vs. no)                              | 1.28         | 0.12-14.27              | 0.84         |
| Radiation dose                                |              |                         |              |
| Continuous                                    | 0.71         | 0.53-0.95               | <b>0.021</b> |
| ≥ 50 Gy vs. < 50 Gy                           | 0.11         | 0.01-1.82               | 0.124        |
| Biologically effective dose (continuous)      | 0.95         | 0.87-1.03               | 0.193        |
| Nodal failure                                 |              |                         |              |
| Yes vs. no                                    | 1.65         | 0.08-33.79              | 0.746        |
| Time to any failure                           | 0.99         | 0.96-1.01               | 0.35         |
| Elsewhere lung failure                        |              |                         |              |
| Yes vs. no                                    | 75.73        | 0.18-32298.36           | 0.161        |
| Time to any failure                           | 0.99         | 0.97-1.00               | 0.088        |
| Distant metastasis (yes vs. no)               | 0.25         | 0.02-3.13               | 0.281        |

Bold p-values are statistically significant. ECOG, Eastern Cooperative Oncology Group; SABR, stereotactic body radiation therapy; PCI, prophylactic cranial irradiation; Gy, Gray; PR, partial response; CR, complete response; SD, stable disease; PD, progressive disease
